# Supplementary material for: A facile Al(iii)-specific fluorescence probe and its application in biological systems
Source: Royal Society of Chemistry journal article supplement (doi:10.1039/c6ra17623b), 2016-01-01
Supplement: c6ra17623b1.pdf [file c6ra17623b1.pdf]

## Supplementary Information

### A facile Al(III)-specific fluorescence probe and its application in biological systems

Haiying Lei,<sup>a</sup> Haipeng Diao,<sup>b</sup> Wen Liu,<sup>b</sup> Jun Xie,<sup>b</sup> Zhijun Wang,<sup>c\*</sup> and Liheng Feng<sup>d\*</sup>

<sup>a</sup>Department of Biological Science and Technology, Changzhi University, Changzhi, 046011, P.R. China.

<sup>b</sup>School of Basic Medical Sciences, Shanxi Medical University, Taiyuan 030001, P.R. China;

<sup>c</sup>Department of Chemistry, Changzhi University, Changzhi, 046011, P.R. China. E-mail: czxywzj@163.com

<sup>d</sup>School of Chemistry and Chemical Engineering, Shanxi University, Taiyuan, 030006, P.R. China. E-mail: lhfeng@sxu.edu.cn

1. The UV-vis absorption spectra of receptor 1 with the introduction of Al<sup>3+</sup> *Fig. S1*
2. The fluorescence spectra of receptor 1 with the addition of Al<sup>3+</sup> *Fig. S2*
3. The fluorescence spectra of receptor 1 in different pH solutions *Fig. S3*
4. The intensity changes of three receptors with Al<sup>3+</sup> *Fig. S4*
5. <sup>1</sup>H NMR spectrograms of receptor 1 and receptor+Al<sup>3+</sup> *Fig. S5*
6. Job plot of receptor 1 and Al<sup>3+</sup> in DMSO/H<sub>2</sub>O mixture media *Fig. S6*
7. Fluorescence imaging of receptor 1 and Al<sup>3+</sup> for HepG-2 cells *Fig. S7*

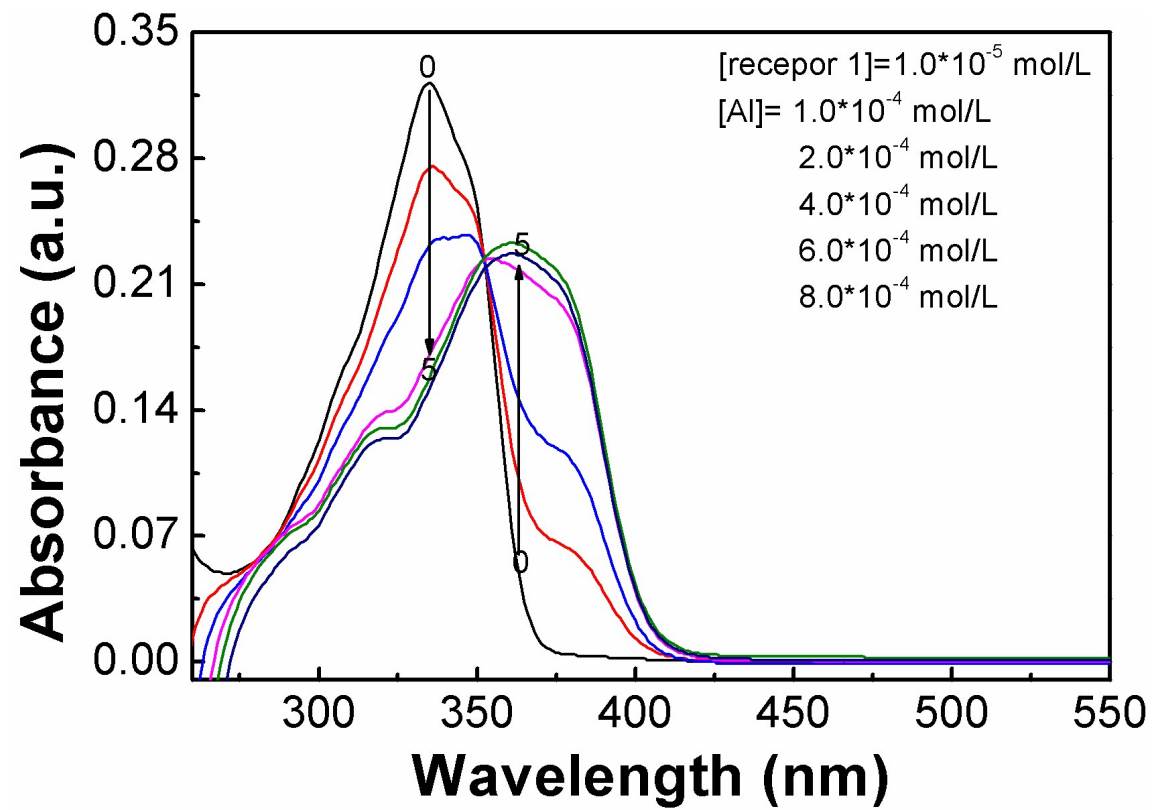

Fig. S1 The UV-vis absorption spectra of receptor 1 with the introduction of Al<sup>3+</sup>.

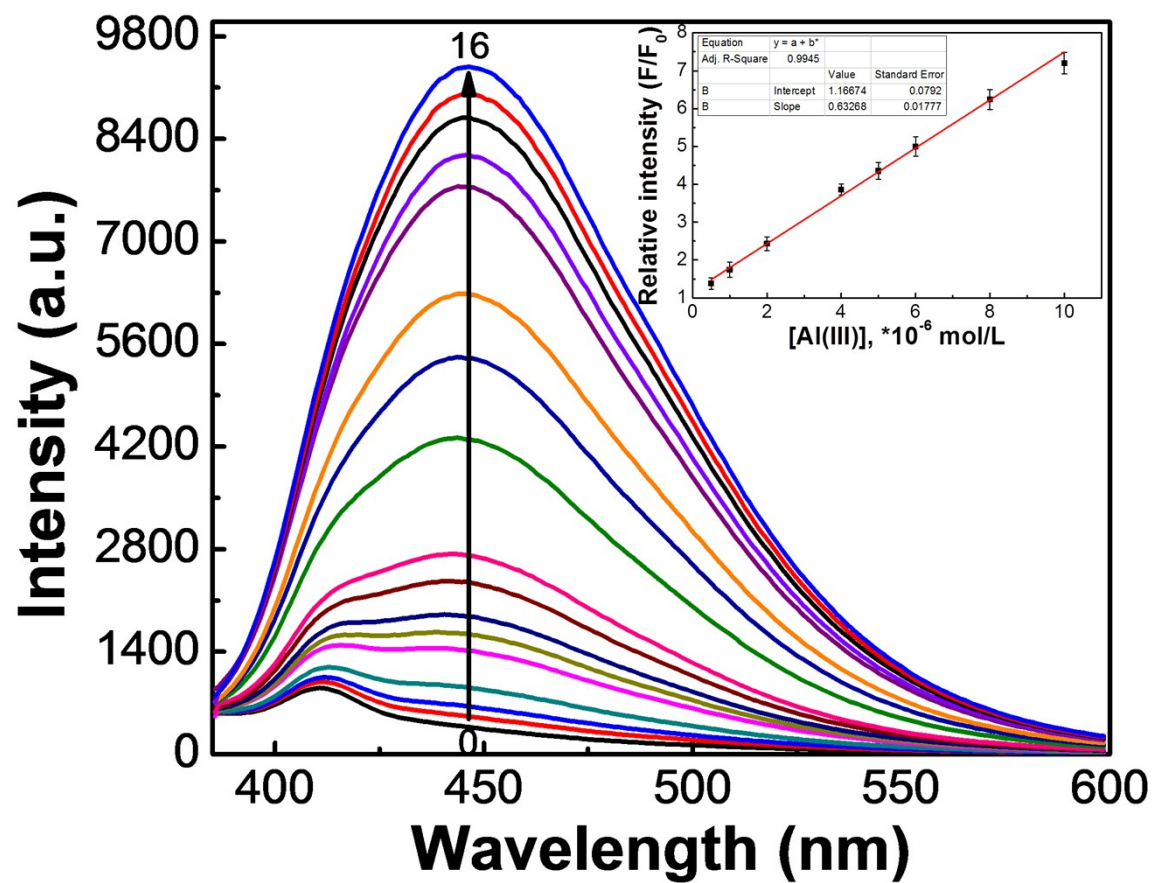

**Fig. S2** The fluorescence spectra of receptor 1 ( $5.0 \times 10^{-6}$  mol/L) with the introduction of  $\text{Al}^{3+}$  from  $10^{-7}$  mol/L to  $10^{-4}$  mol/L in  $\text{H}_2\text{O}/\text{DMSO}$  mixture media.

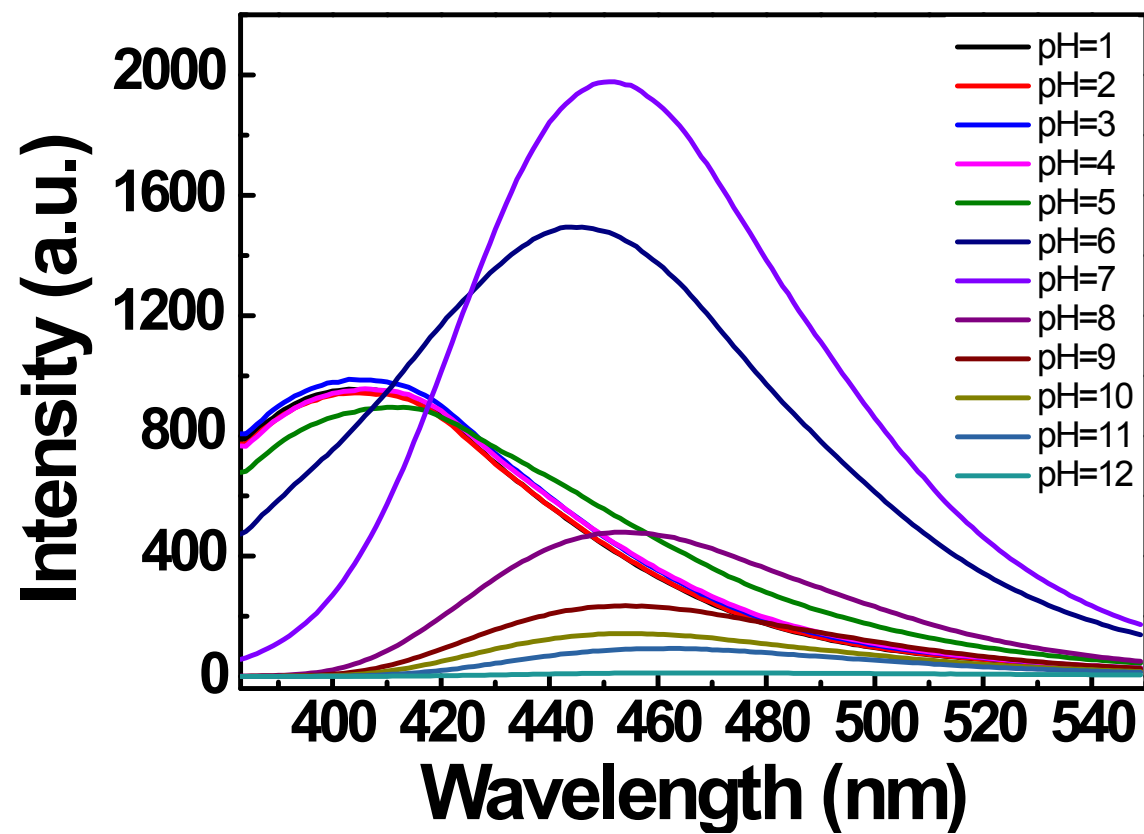

**Fig. S3** The fluorescence spectra of receptor 1 ( $5.0 \times 10^{-6}$  mol/L) in different pH solutions.

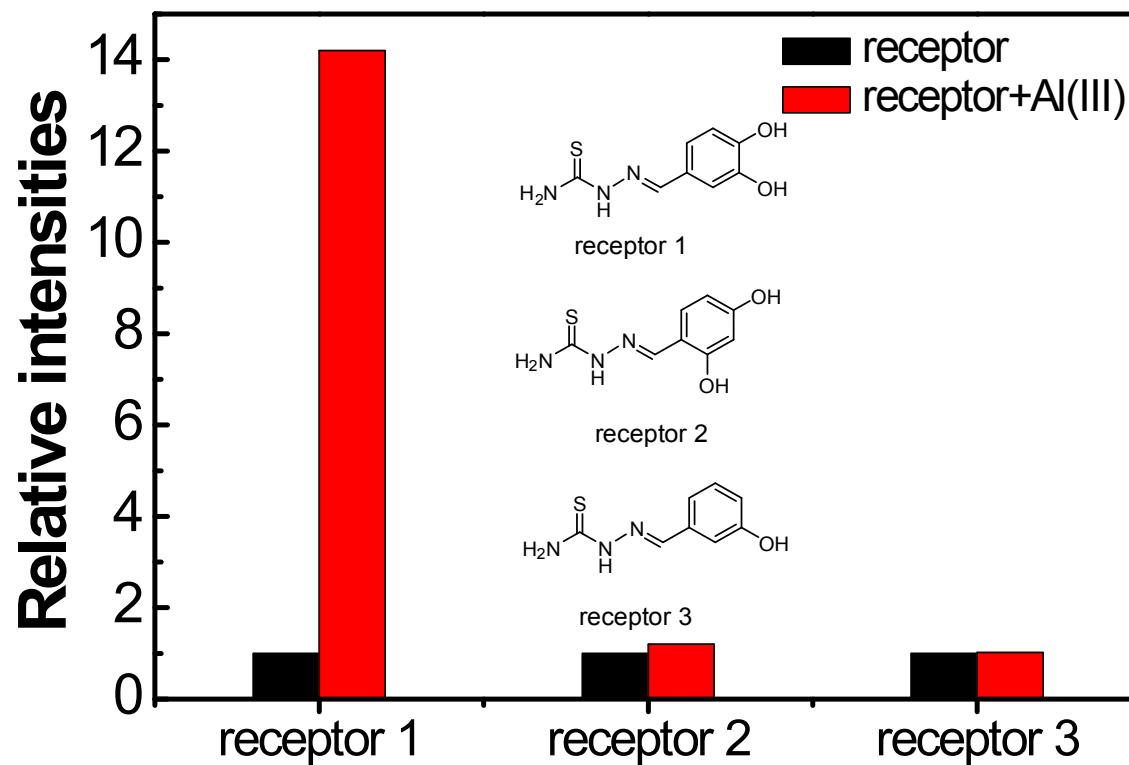

**Fig. S4** The relative intensities changes of three receptors ( $5.0 \times 10^{-6}$  mol/L) in the present of  $\text{Al}^{3+}$  ( $3.0 \times 10^{-5}$  mol/L) in  $\text{H}_2\text{O}/\text{DMSO}$  (2/3, v/v) mixed media.

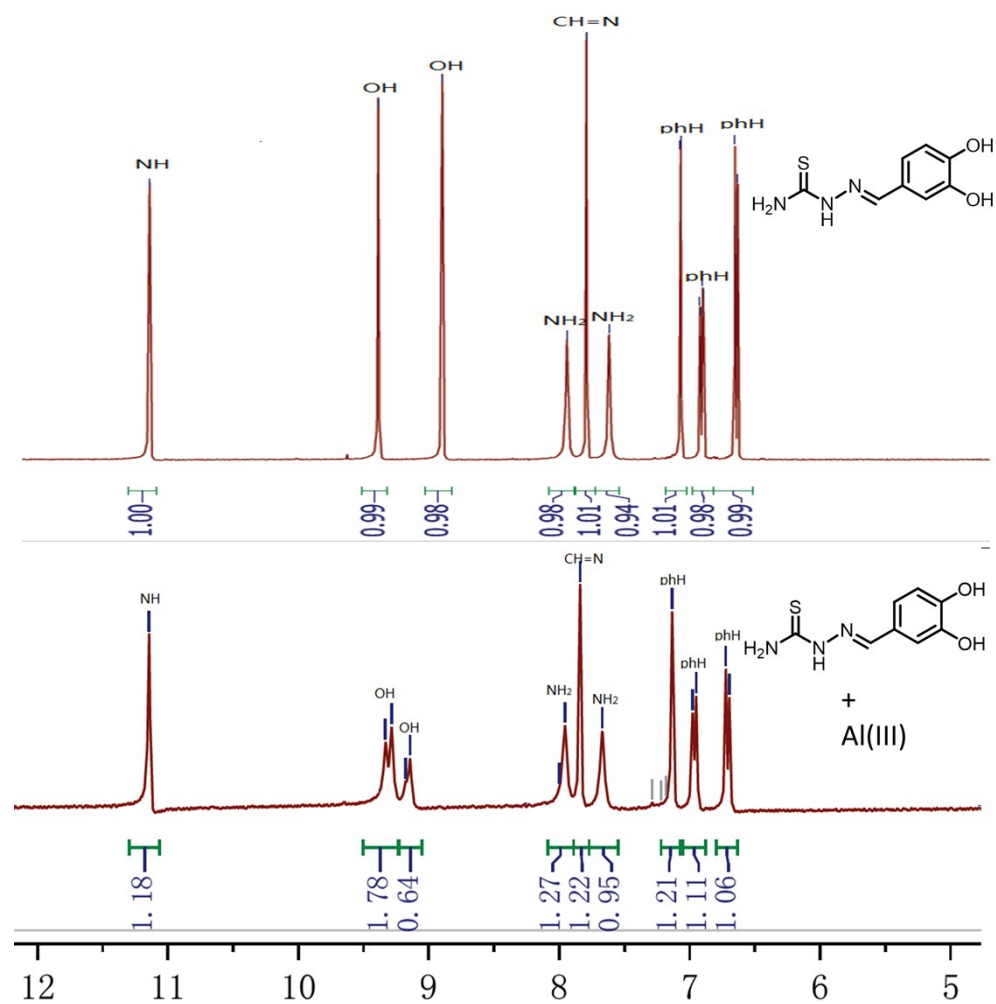

**Fig. S5**  $^1\text{H}$  NMR spectrograms of receptor 1 and receptor+Al(III) in  $d$ -DMSO solvents.

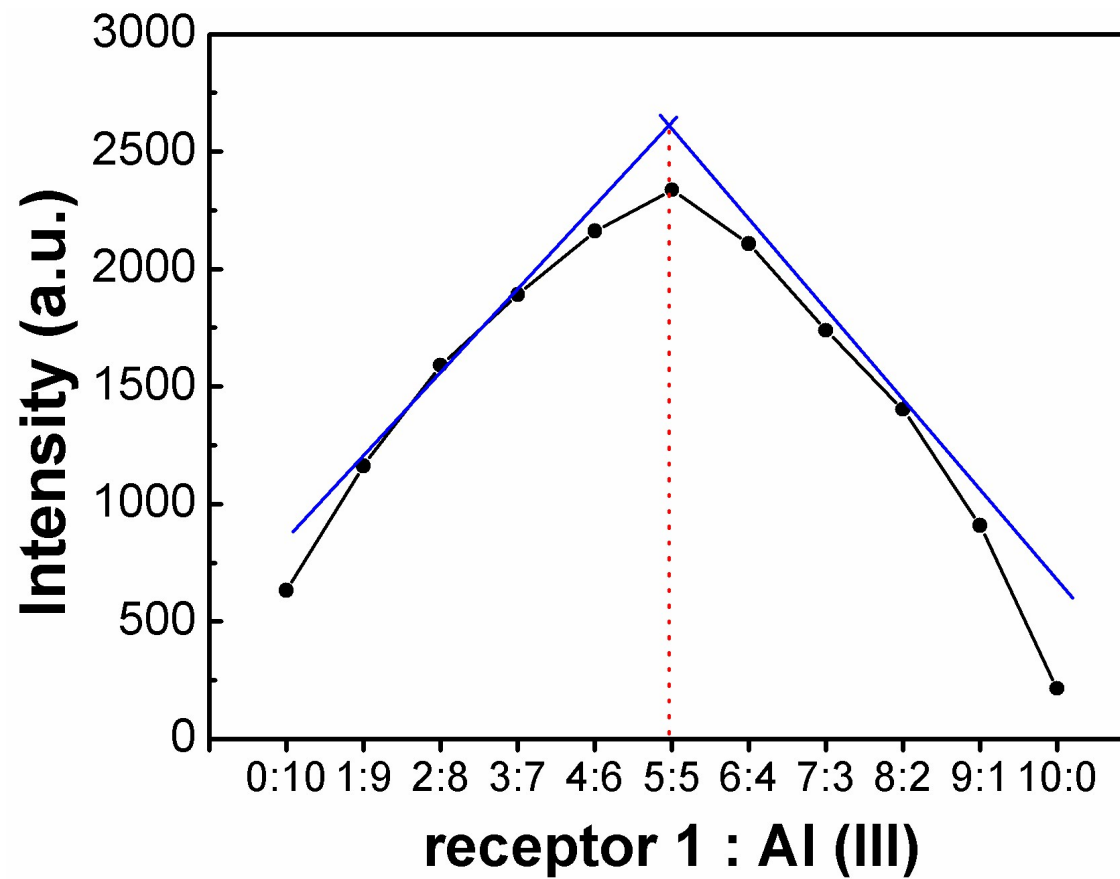

**Fig. S6** Job plot of receptor 1 and Al(III) in DMSO/H<sub>2</sub>O (2/3, v/v) mixed media. The total concentration of receptor 1 and Al(III) is  $1.0 \times 10^{-5}$  mol/L.

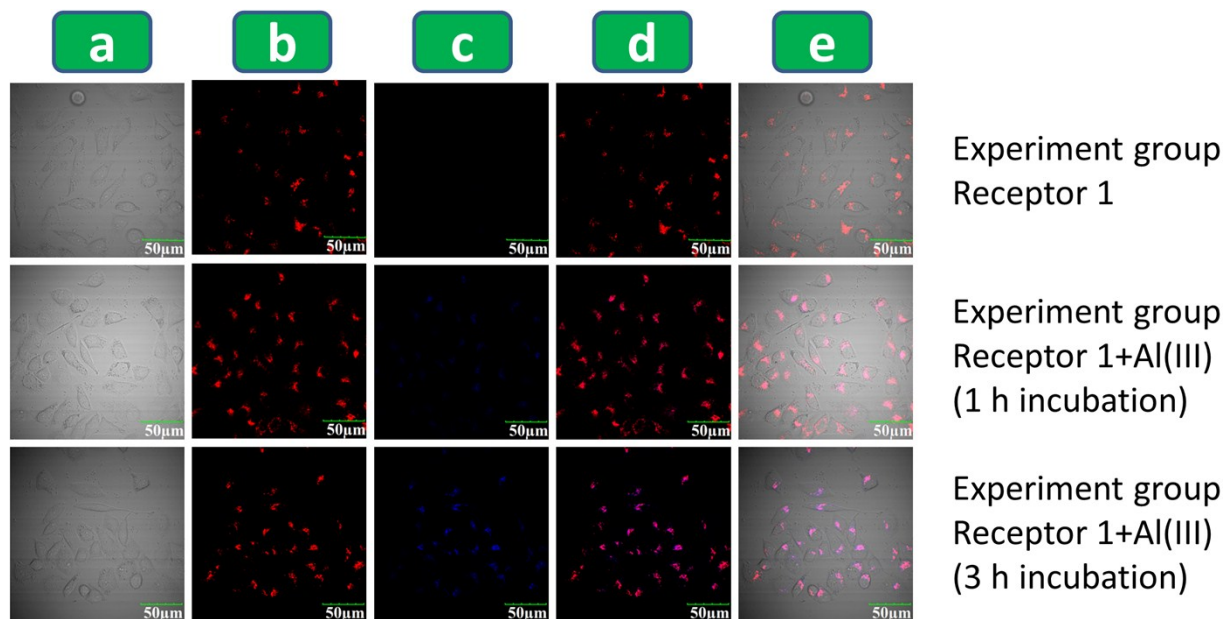

**Fig. S7** Fluorescence imaging of HepG-2 cells with receptor 1 and Al<sup>3+</sup> in different cultured time. a) is bright image, b) is fluorescence image of cytoplasm located dye (Lyso tracker red), c) is fluorescence image of receptor 1 or receptor 1/Al<sup>3+</sup>, d) is merged image of located dye and receptors or receptor 1/Al<sup>3+</sup>, e) is merged bright image and fluorescence image of located dye and receptor 1 or receptor 1/Al<sup>3+</sup>.
